# Supplementary material for: Plasma Fatty Acid–Binding Protein 4, Nonesterified Fatty Acids, and Incident Diabetes in Older Adults
Source: PubMed Central journal article supplement — Diabetes Care. 2012 Jul 14;35(8):1701–7. doi: 10.2337/dc11-1690 (PMC3402261; doi:10.2337/dc11-1690), 2012-07-14
Supplement: supp_dc11-1690v111690_DC111690SupplementaryData.pdf [file supp_dc11-1690v111690_DC111690SupplementaryData.pdf]

SUPPLEMENTARY DATA

**Supplementary Table 1.** Spearman correlation coefficients between log-FABP4, non-esterified free fatty acids and various risk factors in the Cardiovascular Health Study

|                     | <b>logFABP4</b> | <b>NEFA</b> |
|---------------------|-----------------|-------------|
| NEFA                | 0.24            |             |
| Body mass index     | 0.38            | 0.04        |
| Waist circumference | 0.28            | 0.02        |
| Log-CRP             | 0.28            | 0.09        |
| Log-HOMA-IR         | 0.29            | 0.04        |
| HDL-cholesterol     | 0.01            | 0.22        |
| LDL-cholesterol     | 0.11            | -0.02       |
| Triglycerides       | 0.27            | 0.11        |
| Insulin             | 0.30            | 0.03        |
| Glucose             | 0.07            | 0.06        |
| Cystatin C          | 0.36            | -0.02       |

**Supplementary Table 2.** Influence of individual potential mediators on the multivariable adjusted hazard ratio of the association between standard deviation of log-FABP4 (0.44) and diabetes in the Cardiovascular Health Study.

|                             | Hazard ratio (95% CI) for diabetes |                  |
|-----------------------------|------------------------------------|------------------|
|                             | Men                                | Women            |
| Fully adjusted model        | 1.45 (1.13-1.85)                   | 1.35 (1.10-1.65) |
| Triglycerides alone         | 1.36 (1.06-1.75)                   | 1.29 (1.05-1.59) |
| LDL alone                   | 1.45 (1.14-1.86)                   | 1.38 (1.13-1.69) |
| HDL alone                   | 1.42 (1.11-1.82)                   | 1.30 (1.05-1.60) |
| CRP-alone                   | 1.44 (1.12-1.85)                   | 1.29 (1.04-1.58) |
| HOMA-IR alone               | 1.24 (0.96-1.61)                   | 1.36 (1.11-1.67) |
| All five mediators together | 1.17 (0.90-1.53)                   | 1.25 (1.01-1.55) |

SUPPLEMENTARY DATA

**Supplementary Table 3.** Baseline characteristics of CHS participants (n=3740) by tertiles of non-esterified fatty acids.

|                                           | Tertiles of NEFA <sup>1</sup> |                 |                 |                      |
|-------------------------------------------|-------------------------------|-----------------|-----------------|----------------------|
|                                           | T1 (low)                      | T2              | T3 (high)       |                      |
| Range (mEq/L)                             | ≤0.39                         | >0.39-0.54      | >0.54           | p-value <sup>2</sup> |
| <b>Characteristics</b>                    |                               |                 |                 |                      |
| NEFA (mEq/L)                              | 0.29 ± 0.07                   | 0.47 ± 0.04     | 0.71 ± 0.15     | <0.001               |
| FABP4 (ng/mL)                             | 29.3 ± 15.3                   | 33.2 ± 16.9     | 36.5 ± 17.3     | <0.001               |
| Age (y) ± SD                              | 74.0 ± 4.8                    | 74.9 ± 5.3      | 75.6 ± 5.5      | <0.001               |
| Male, n (%)                               | 704 (56.0)                    | 478 (38.5)      | 299 (24.1)      | <0.001               |
| Black Race, n (%)                         | 180 (14.3)                    | 167 (13.5)      | 195 (15.7)      | 0.33                 |
| < HS education, n (%)                     | 286 (22.8)                    | 309 (24.9)      | 324 (26.1)      | 0.05                 |
| Smoking, n (%)                            |                               |                 |                 |                      |
| Former                                    | 611 (48.6)                    | 533 (43.0)      | 495 (39.9)      |                      |
| Current                                   | 130 (10.3)                    | 142 (11.4)      | 103 (8.3)       | <0.001               |
| Alcoholic consumption, n (%) <sup>3</sup> |                               |                 |                 |                      |
| None                                      | 628 (50.0)                    | 640 (51.6)      | 686 (55.2)      |                      |
| Low                                       | 459 (36.5)                    | 428 (34.5)      | 366 (29.5)      |                      |
| Medium                                    | 82 (6.5)                      | 77 (6.2)        | 70 (5.6)        |                      |
| High                                      | 88 (7.0)                      | 96 (7.7)        | 120 (9.7)       | 0.003                |
| Body mass index (kg/m <sup>2</sup> )      | 26.1 ± 3.9                    | 26.5 ± 4.6      | 26.7 ± 5.1      | <0.001               |
| Waist circumference (cm)                  | 95.7 ± 11.2                   | 96.1 ± 13.4     | 96.5 ± 13.7     | 0.10                 |
| Physical activity (kcal/wk)               | 1687.4 ± 1877.2               | 1481.0 ± 1779.1 | 1299.5 ± 1664.6 | <0.001               |
| Systolic BP (mmHg)                        | 132.4 ± 20.6                  | 134.9 ± 21.3    | 140.0 ± 21.1    | <0.001               |
| Diastolic BP (mmHg)                       | 71.2 ± 10.7                   | 71.3 ± 11.5     | 71.9 ± 11.3     | 0.13                 |

SUPPLEMENTARY DATA

|                                         |              |              |              |        |
|-----------------------------------------|--------------|--------------|--------------|--------|
| Total cholesterol (mg/dL)               | 197.6 ± 36.3 | 203.2 ± 36.2 | 208.2 ± 39.8 | <0.001 |
| HDL cholesterol (mg/dL)                 | 51.1 ± 13.4  | 53.9 ± 13.7  | 58.7 ± 15.5  | <0.001 |
| Triglycerides (mg/dL)                   | 128.7 ± 69.3 | 139.8 ± 76.7 | 145.3 ± 80.3 | <0.001 |
| Fasting glucose (mg/dL)                 | 96.6 ± 9.8   | 97.4 ± 10.1  | 97.9 ± 9.8   | 0.001  |
| CRP (mg/L)                              | 4.1 ± 7.7    | 5.2 ± 9.8    | 5.4 ± 8.6    | <0.001 |
| Serum albumin (g/dL)                    | 3.9 ± 0.3    | 4.0 ± 0.3    | 4.0 ± 0.3    | <0.001 |
| Current estrogen use, n(%) <sup>4</sup> | 61 (4.9)     | 105 (8.5)    | 173 (13.9)   | <0.001 |
| Health Status, n (%)                    |              |              |              |        |
| Excellent                               | 120 (9.6)    | 87 (7.0)     | 57 (4.6)     |        |
| Very good                               | 480 (38.2)   | 407 (32.8)   | 365 (29.4)   |        |
| Good                                    | 474 (37.7)   | 539 (43.4)   | 563 (45.3)   |        |
| Fair                                    | 170 (13.5)   | 190 (15.3)   | 229 (18.4)   |        |
| Poor                                    | 13 (1.0)     | 18 (1.5)     | 28 (2.3)     | <0.001 |

<sup>1</sup> values shown are mean ± SD unless otherwise noted.

<sup>2</sup> p for trend, except smoking status, alcohol consumption, and health status, where the p-value is from a chi-square test

<sup>3</sup> Low= <0.5 drinks/d for women, <1 drink/d for men; Medium= 0.5-1 drink/d for women, 1-2 drinks/d for men; High= >1 drink/d for women, >2 drinks/d for men.

<sup>4</sup> Among women
